# Supplementary material for: Antibodies to Streptococcus pneumoniae Capsular Polysaccharide Enhance Pneumococcal Quorum Sensing
Source: PubMed Central journal article supplement — mBio. 2011 Sep 13;2(5):e00176-11. doi: 10.1128/mBio.00176-11 (PMC3171983; doi:10.1128/mbio.00176-11), 2011-09-13
Supplement: mbo005111159st1.pdf [file mbo005111159st1.pdf]

1 **Supplementary Table 1: Primers used in this study**

|               |                                                         |
|---------------|---------------------------------------------------------|
| <b>ComX.F</b> | GGC ATG CTC TGC TTA CAT GAA                             |
| <b>ComX.R</b> | GGG TTC TTT ATC GTA TCT ACG CTT C                       |
| <b>ComA.F</b> | AAT TTA ACC GTT CCC CAA GG                              |
| <b>ComA.R</b> | CCC TTG ACT TGG GTC GTA AA                              |
| <b>ComF.F</b> | TCC AGA TAC TCA AAG CCT GCT                             |
| <b>ComF.R</b> | CGC TTC ATT TTT AAG TGA GGA GTT GA                      |
| <b>ComB.F</b> | AAG AAG GGG CAG AGG GT                                  |
| <b>ComB.R</b> | TAG CCA AAC TTA TCC TCC TCT GG                          |
| <b>ComD.F</b> | GAC TTG TGA GGA GAA TAA AAT CGC TG                      |
| <b>ComD.R</b> | TGT ATA TTG AAA CAA CAG GGG TAT CTC A                   |
| <b>ComE.F</b> | GCT CAG CTC ATT CGT CAT TAC AA                          |
| <b>ComE.R</b> | TGA GGA GAA TAA AAT CGC TGA GT                          |
| <b>ComM.F</b> | AGG AAA CTT CCT TCT TAA CCG AAT TTG                     |
| <b>ComM.R</b> | AGA AAA AAG ACA GTG TG GTG ACT AT                       |
| <b>BlpX.F</b> | GCT AAT AAA GGG GTG GCG G                               |
| <b>BlpX.R</b> | CCT CGC ATC CAA ACC AAG AT                              |
| <b>BlpY.F</b> | CTA GTC TTG GCT TCT GAC ACC                             |
| <b>BlpY.R</b> | CCA GCC CCT ATG AAT ATA GCC A                           |
| <b>BlpN.F</b> | GCT GAG TGA GGT TTA TGG AGG                             |
| <b>BlpN.R</b> | GAT GTA GCG GTA TAG GCT AA TAT CC                       |
| <b>BlpO.F</b> | TCT ATC GTA TCT ATT GGG TGG CTT                         |
| <b>BlpO.R</b> | CTC GCA TCC AAA CCA AGA TAA AGT                         |
| <b>CbpD.F</b> | TTG CAC TAA CTA GGG GTT CAG TTT TGA TAG CA              |
| <b>CbpD.R</b> | GAC GGC TAC AAG TGG TTG AGT TAT ACT G                   |
| <b>CibA.F</b> | TCC TAA AAA ATA ACC AGC TGC CAA ACC AGA A               |
| <b>CibA.R</b> | CAA ATT TTG ACA TTC TTG ACA ATC AAT TTT TAT CCT TAT CTG |
| <b>CibB.F</b> | CTA GCA TGA TTT ACC AAA CTT TTT ACG AAG GTC TTT         |
| <b>CibB.R</b> | ATG ATG AAA GAT TTG AAC AAC TAT CGT GAA ATT TCT AAT AAG |
| <b>rRNA.F</b> | ATA GCC GAC CTG AGA GGG TGA                             |
| <b>rRNA.R</b> | TAC AAG CCAGAG AGC CGC TTT                              |

2

3

4

5

6

7
