# Supplementary material for: Antibodies to Streptococcus pneumoniae Capsular Polysaccharide Enhance Pneumococcal Quorum Sensing
Source: PubMed Central journal article supplement — mBio. 2011 Sep 13;2(5):e00176-11. doi: 10.1128/mBio.00176-11 (PMC3171983; doi:10.1128/mbio.00176-11), 2011-09-13
Supplement: mbo005111159st2.pdf [file mbo005111159st2.pdf]

1 **Supplementary Table 2: Gene expression of A66.1 cells treated with CSP2, MAbs and**  
2 **CSP2 plus MAbs**  
3 S2a. Differentially expressed genes comparing CSP2-treated and untreated A66.1 cells two  
4 minutes after incubation. Genes that exhibited a > 2.5 fold increase are shown. Hypothetical  
5 genes, which are not included, are shown in supplementary Table 3.

| SEQ_ID              | FUNCTION                                                         | Fold change |
|---------------------|------------------------------------------------------------------|-------------|
| SP_2207080700002076 | competence protein ComF, putative                                | 66.6        |
| SP_1266080700001180 | DNA processing protein DprA, putative                            | 53.1        |
| SP_0954080700000884 | competence protein CeiA                                          | 45.5        |
| SP_0955080700000885 | competence protein CeiB                                          | 42.2        |
| SP_2208080700002077 | helicase, putative                                               | 39.6        |
| SP_2201080700002070 | choline binding protein D                                        | 38.4        |
| SP_1908080700001793 | single-strand DNA-binding protein                                | 34.8        |
| SP_2051080700001932 | competence protein CglC                                          | 32.6        |
| SP_2052080700001933 | competence protein CglB                                          | 29.5        |
| SP_2050080700001931 | competence protein CglD                                          | 28.7        |
| SP_1808080700001696 | type IV prepilin peptidase, putative                             | 28.2        |
| SP_2049080700001930 | hypothetical protein                                             | 26.5        |
| SP_0957080700000887 | ABC transporter, ATP-binding protein                             | 26.2        |
| SP_2053080700001934 | competence protein CglA                                          | 25.9        |
| SP_0042080700000038 | competence factor transporting ATP-binding/permease protein ComA | 24.7        |
| SP_0014080700000014 | transcriptional regulator ComX1                                  | 22.6        |
| SP_0978080700000908 | competence protein CoiA                                          | 19.6        |
| SP_2236080700002101 | putative sensor histidine kinase ComD                            | 19.1        |
| SP_1945080700001829 | hypothetical protein                                             | 18.1        |
| SP_1717080700001609 | ABC transporter, ATP-binding protein                             | 15.5        |
| SP_1941080700001825 | competence damage-inducible protein A                            | 15.5        |
| SP_1988080700001872 | immunity protein, putative                                       | 14.1        |
| SP_2235080700002100 | response regulator ComE                                          | 10.6        |
| SP_1088080700001010 | DNA repair protein RadC                                          | 10.2        |
| SP_0043080700000039 | competence factor transport protein ComB                         | 10.0        |
| SP_1987080700001871 | ABC transporter, ATP-binding protein                             | 9.8         |
| SP_0544080700000510 | immunity protein BlpX                                            | 8.2         |
| SP_1809080700001697 | transcriptional regulator                                        | 7.8         |
| SP_1714080700001606 | GntR family transcriptional regulator                            | 7.3         |

|                     |                                                            |     |
|---------------------|------------------------------------------------------------|-----|
| SP_0529080700000496 | BlpC ABC transporter                                       | 7.2 |
| SP_0030080700000027 | competence-induced protein Ccs16                           | 7.2 |
| SP_1110080700001031 | bifunctional riboflavin kinase/FMN adenylyltransferase     | 6.7 |
| SP_0545080700000511 | immunity protein BlpY                                      | 6.5 |
| SP_0524080700000491 | BlpT protein, fusion                                       | 5.0 |
| SP_0047080700000043 | phosphoribosylaminoimidazole synthetase                    | 5.0 |
| SP_0942080700000874 | IS1381 transposase protein A                               | 4.6 |
| SP_0046080700000042 | amidophosphoribosyltransferase                             | 4.2 |
| SP_1089080700001011 | glutamine amidotransferase, class I                        | 4.1 |
| SP_1729080700001620 | truncated IS1381 transposase                               | 4.1 |
| SP_0540080700000506 | BlpN protein                                               | 4.0 |
| SP_1310080700001221 | IS1381 transposase protein A                               | 3.8 |
| SP_0048080700000044 | phosphoribosylglycinamide formyltransferase                | 3.7 |
| SP_0528080700000495 | peptide pheromone BlpC                                     | 3.6 |
| SP_2206080700002075 | ribosomal subunit interface protein                        | 3.5 |
| SP_1812080700001700 | tryptophan synthase subunit beta                           | 3.4 |
| SP_1894080700001780 | sucrose phosphorylase                                      | 3.3 |
| SP_0021080700000020 | deoxyuridine 5'-triphosphate nucleotidohydrolase           | 3.3 |
| SP_0044080700000040 | phosphoribosylaminoimidazole-succinocarboxamidesynthase    | 3.3 |
| SP_1898080700001784 | alpha-galactosidase                                        | 3.2 |
| SP_0053080700000049 | phosphoribosylaminoimidazole carboxylase catalytic subunit | 3.1 |
| SP_2186080700002055 | glycerol kinase                                            | 3.1 |
| SP_1857080700001744 | cation efflux system protein                               | 2.9 |
| SP_0368080700000344 | cell wall surface anchor family protein                    | 2.9 |
| SP_0045080700000041 | phosphoribosylformylglycinamide synthase, putative         | 2.9 |
| SP_0054080700000050 | phosphoribosylaminoimidazole carboxylase ATPase subunit    | 2.8 |
| SP_1811080700001699 | tryptophan synthase subunit alpha                          | 2.8 |
| SP_1927080700001811 | IS1381 transposase protein A                               | 2.7 |
| SP_1813080700001701 | N-(5'-phosphoribosyl)anthranilate isomerase                | 2.7 |
| SP_2142080700002017 | ROK family protein                                         | 2.6 |
| SP_2158080700002030 | L-fucose isomerase                                         | 2.6 |
| SP_1086080700001008 | IS1381 transposase protein B                               | 2.6 |
| SP_2240080700002105 | spspoJ protein                                             | 2.6 |
| SP_1980080700001864 | cmp-binding-factor 1                                       | 2.5 |
| SP_0541080700000507 | bacteriocin BlpO                                           | 2.5 |
| SP_2035080700001917 | 3-keto-L-gulonate-6-phosphate decarboxylase                | 2.5 |

1 S2b. Differentially expressed genes comparing CSP2-treated and untreated A66.1 cells two  
 2 minutes after incubation. Genes that exhibited a > 2.5 fold decrease in expression are shown.  
 3 Hypothetical genes, which are not included, are shown in supplementary Table 3.

| SEQ ID              | FUNCTION                                                 | Fold change |
|---------------------|----------------------------------------------------------|-------------|
| SP_1821080700001709 | LacI family sugar-binding transcriptional regulator      | 3.1         |
| SP_1171080700001090 | HAD superfamily hydrolase                                | 2.9         |
| SP_0985080700000913 | regulatory protein, putative                             | 2.9         |
| SP_1294080700001208 | chromosome condensation/ camphor resistance protein CrcB | 2.8         |
| SP_1182080700001101 | lactose phosphotransferase system repressor              | 2.8         |
| SP_2119080700001996 | transcriptional regulator, putative                      | 2.8         |
| SP_1115080700001036 | transcriptional regulator MutR, putative                 | 2.7         |
| SP_1249080700001164 | guanosine 5'-monophosphate oxidoreductase                | 2.6         |
| SP_0012080700000012 | hypoxanthine-guanine phosphoribosyltransferase           | 2.6         |

4  
 5  
 6  
 7  
 8  
 9  
 10  
 11  
 12  
 13

1 S2c. Differentially expressed genes comparing CSP2- and CSP2 plus 1E2 (ms IgG<sub>1</sub> to PPS3)-  
2 treated A66.1 cells two minutes after incubation. Genes that exhibited a > 2.5 fold decrease in  
3 expression are shown. Hypothetical genes, which are not included, are shown in supplementary  
4 Table 3.

| <b>SEQ_ID</b>       | <b>FUNCTION</b>                        | <b>Fold change</b> |
|---------------------|----------------------------------------|--------------------|
| SP_0729080700000677 | cation transporter E1-E2 family ATPase | 6.3                |
| SP_0727080700000675 | transcriptional repressor, putative    | 6.2                |

5  
6  
7  
8  
9  
10  
11  
12  
13  
14  
15  
16  
17

1 S2d. Differentially expressed genes comparing CSP2- and CSP2 plus 1E2 (ms IgG<sub>1</sub> to PPS3)-  
2 treated A66.1 cells eight minutes after incubation. Genes that exhibited a > 2.5 fold decrease in  
3 expression are shown. Hypothetical genes, which are not included, are shown in supplementary  
4 Table 3.

| <b>SEQ_ID</b>       | <b>FUNCTION</b>                           | <b>Fold change</b> |
|---------------------|-------------------------------------------|--------------------|
| SP_1249080700001164 | guanosine 5'-monophosphate oxidoreductase | 2.8                |

5

6

7

8

9

10

11

12

13

14

15

16

1 S2e. Differentially expressed genes comparing 1E2 (ms IgG<sub>1</sub> to PPS3)-treated and untreated  
2 A66.1 cells at bacterial growth of OD<sub>405</sub>: 0.032. Genes that exhibited a > 2.5 fold decrease in  
3 expression are shown. Hypothetical genes, which are not included, are shown in supplementary  
4 Table 3.

| <b>SEQ_ID</b>       | <b>FUNCTION</b>                             | <b>Fold change</b> |
|---------------------|---------------------------------------------|--------------------|
| SP_0082080700000077 | cell wall surface anchor family protein     | 5.9                |
| SP_0395080700000368 | transcriptional regulator, putative         | 2.6                |
| SP_0396080700000369 | PTS system, mannitol-specific IIA component | 2.6                |
| SP_2150080700002024 | ornithine carbamoyltransferase              | 2.5                |
| SP_0090080700000084 | ABC transporter, permease protein           | 2.5                |

5  
6  
7  
8  
9  
10  
11  
12  
13  
14  
15

1 S2f. Differentially expressed genes comparing control MAb 31B12 (ms IgG<sub>1</sub>to PPS8)-treated  
2 and untreated A66.1 cells at bacterial growth at OD<sub>405</sub>: 0.032. Genes that exhibited a > 2.5 fold  
3 decrease in expression are shown. Hypothetical genes, which are not included, are shown in  
4 supplementary Table 3.

| <b>SEQ_ID</b>       | <b>FUNCTION</b>                                         | <b>Fold change</b> |
|---------------------|---------------------------------------------------------|--------------------|
| SP_1809080700001697 | transcriptional regulator                               | 2.9                |
| SP_1294080700001208 | chromosome condensation/camphor resistance protein CrcB | 2.7                |
| SP_0082080700000077 | cell wall surface anchor family protein                 | 2.7                |
| SP_0641080700000599 | serine protease                                         | 2.6                |

5  
6  
7  
8  
9  
10  
11  
12  
13  
14  
15  
16  
17  
18  
19
