# Supplementary material for: Antibodies to Streptococcus pneumoniae Capsular Polysaccharide Enhance Pneumococcal Quorum Sensing
Source: PubMed Central journal article supplement — mBio. 2011 Sep 13;2(5):e00176-11. doi: 10.1128/mBio.00176-11 (PMC3171983; doi:10.1128/mbio.00176-11), 2011-09-13
Supplement: mbo005111159st3.pdf [file mbo005111159st3.pdf]

1 **Supplementary Table 3: Top 25 hypothetical genes increased or decreased by >2.5 fold by**  
 2 **1E2, CSP2, and/or controls**  
 3 S3a. Differentially expressed genes, increased in expression by > 2.5 fold comparing CSP2-  
 4 treated and untreated A66.1 cells.

| <b>SEQ_ID</b>       | <b>Fold change</b> |
|---------------------|--------------------|
| SP_0125080700000118 | 48.2               |
| SP_2048080700001929 | 34.0               |
| SP_2047080700001928 | 29.7               |
| SP_2049080700001930 | 26.5               |
| SP_0018080700000017 | 22.5               |
| SP_1945080700001829 | 18.1               |
| SP_0958080700000888 | 14.2               |
| SP_1481080700001385 | 12.8               |
| SP_1480080700001384 | 12.7               |
| SP_0031080700000028 | 12.0               |
| SP_0029080700000026 | 11.9               |
| SP_1716080700001608 | 11.4               |
| SP_1810080700001698 | 11.1               |
| SP_0547080700000513 | 10.6               |
| SP_0782080700000728 | 10.6               |
| SP_1986080700001870 | 10.3               |
| SP_0543080700000509 | 8.5                |
| SP_0546080700000512 | 8.1                |

5  
 6  
 7  
 8

- 1 S3b. Differentially expressed genes, increased in expression by > 2.5 fold comparing CSP2-
- 2 treated and CSP2 plus 1E2-treated A66.1 cells at two minutes

| <b>SEQ_ID</b>       | <b>Fold change</b> |
|---------------------|--------------------|
| SP_1480080700001384 | 5.6                |
| SP_0782080700000728 | 4.4                |
| SP_0518080700000485 | 4.4                |
| SP_1810080700001698 | 3.9                |
| SP_1481080700001385 | 3.9                |
| SP_0822080700000764 | 3.4                |
| SP_1096080700001018 | 3.2                |
| SP_1150080700001069 | 3.1                |
| SP_0099080700000093 | 3.0                |
| SP_1494080700001396 | 2.9                |
| SP_0800080700000746 | 2.8                |
| SP_2143080700002018 | 2.7                |
| SP_0031080700000028 | 2.7                |
| SP_1938080700001822 | 2.7                |
| SP_0319080700000302 | 2.7                |
| SP_0022080700000021 | 2.6                |
| SP_2144080700002019 | 2.6                |

- 3
- 4
- 5
- 6
- 7

1 S3c. Differentially expressed genes, increased in expression by > 2.5 fold comparing CSP2-  
2 treated and CSP2 plus 1E2-treated A66.1 cells at eight minutes

| SEQ ID              | Fold change |
|---------------------|-------------|
| SP_1882080700001769 | 3.9         |
| SP_0748080700000694 | 3.5         |
| SP_1696080700001588 | 3.4         |
| SP_1556080700001453 | 3.4         |
| SP_0195080700000182 | 3.3         |
| SP_0822080700000764 | 2.8         |

3  
4  
5  
6  
7  
8  
9  
10  
11  
12  
13  
14  
15  
16  
17  
18

- 1 S3d. Differentially expressed genes, increased in expression by > 2.5 fold comparing 1E2-treated
- 2 and untreated A66.1 cells.

| <b>SEQ_ID</b>       | <b>Fold change</b> |
|---------------------|--------------------|
| SP_0888080700000825 | 5.4                |
| SP_0162080700000151 | 4.3                |
| SP_0172080700000160 | 4.2                |
| SP_1134080700001054 | 3.5                |
| SP_0956080700000886 | 3.3                |
| SP_1760080700001650 | 3.2                |
| SP_0073080700000069 | 2.9                |
| SP_1635080700001528 | 2.9                |
| SP_1740080700001631 | 2.7                |
| SP_1949080700001833 | 2.6                |
| SP_1143080700001063 | 2.6                |
| SP_2144080700002019 | 2.6                |
| SP_2143080700002018 | 2.6                |
| SP_1741080700001632 | 2.6                |
| SP_1660080700001553 | 2.6                |
| SP_1307080700001220 | 2.6                |
| SP_1768080700001658 | 2.5                |

- 3
- 4
- 5
- 6
- 7

- 1 S3e. Differentially expressed genes, reduced in expression >2.5 fold by CSP2-treated compared
- 2 to untreated A66.1 cells

| SEQ_ID              | Fold change |
|---------------------|-------------|
| SP_1036080700000961 | 4.4         |
| SP_1170080700001089 | 4.3         |
| SP_0679080700000631 | 4.3         |
| SP_0763080700000709 | 4.0         |
| SP_0472080700000440 | 4.0         |
| SP_1694080700001586 | 4.0         |
| SP_1658080700001551 | 3.7         |
| SP_1052080700000976 | 3.7         |
| SP_1424080700001331 | 3.6         |
| SP_1428080700001335 | 3.4         |
| SP_2118080700001995 | 3.4         |
| SP_1657080700001550 | 3.3         |
| SP_0705080700000655 | 3.0         |
| SP_1630080700001523 | 3.0         |
| SP_0693080700000645 | 2.9         |
| SP_0270080700000255 | 2.8         |
| SP_0706080700000656 | 2.8         |
| SP_0449080700000419 | 2.7         |
| SP_1910080700001795 | 2.7         |
| SP_0238080700000225 | 2.7         |
| SP_2132080700002008 | 2.7         |
| SP_1947080700001831 | 2.6         |

|                     |     |
|---------------------|-----|
| SP_1958080700001842 | 2.6 |
| SP_2117080700001994 | 2.6 |
| SP_1545080700001442 | 2.6 |
| SP_0077080700000073 | 2.6 |
| SP_0174080700000162 | 2.6 |
| SP_1030080700000955 | 2.6 |
| SP_1209080700001126 | 2.6 |
| SP_0482080700000450 | 2.6 |
| SP_0076080700000072 | 2.6 |
| SP_0694080700000646 | 2.5 |

- 1
- 2
- 3
- 4
- 5
- 6
- 7
- 8
- 9
- 10
- 11
- 12
- 13
- 14

- 1 S3f. Differentially expressed genes, reduced in expression >2.5 fold by CSP2-treated compared
- 2 to CPS2 plus 1E2-treated A66.1 cells at two minutes

| <b>SEQ_ID</b>       | <b>Fold change</b> |
|---------------------|--------------------|
| SP_0728080700000676 | 5.2                |
| SP_1036080700000961 | 3.5                |
| SP_0679080700000631 | 3.2                |
| SP_1052080700000976 | 2.6                |
| SP_0763080700000709 | 2.6                |
| SP_1788080700001676 | 2.5                |

- 3
- 4
- 5
- 6
- 7
- 8
- 9
- 10
- 11
- 12
- 13
- 14
- 15
- 16
- 17
- 18

- 1 S3g. Differentially expressed genes, reduced in expression >2.5 fold by CSP2-treated compared
- 2 to CPS2 plus 1E2-treated A66.1 cells at eight minutes

| <b>SEQ_ID</b>       | <b>Fold change</b> |
|---------------------|--------------------|
| SP_2233080700002098 | 4.8                |
| SP_0304080700000288 | 4.3                |
| SP_2160080700002032 | 3.8                |
| SP_1935080700001819 | 3.2                |
| SP_1832080700001720 | 3.2                |
| SP_0114080700000107 | 3.0                |
| SP_0133080700000123 | 2.9                |
| SP_0098080700000092 | 2.9                |
| SP_1628080700001521 | 2.8                |
| SP_1422080700001329 | 2.7                |
| SP_1494080700001396 | 2.7                |
| SP_0108080700000102 | 2.7                |
| SP_0003080700000003 | 2.7                |
| SP_1835080700001723 | 2.7                |
| SP_1934080700001818 | 2.6                |
| SP_1223080700001139 | 2.5                |

- 3
- 4
- 5
- 6
- 7



- 1 S3h. Differentially expressed genes, reduced in expression >2.5 fold by 1E2-treated compared to
- 2 untreated A66.1 cells

| <b>SEQ_ID</b>       | <b>Fold change</b> |
|---------------------|--------------------|
| SP_1977080700001861 | 6.2                |
| SP_1170080700001089 | 5.8                |
| SP_1052080700000976 | 4.3                |
| SP_1036080700000961 | 4.0                |
| SP_0763080700000709 | 3.8                |
| SP_0699080700000650 | 3.7                |
| SP_0238080700000225 | 3.6                |
| SP_0472080700000440 | 3.5                |
| SP_1958080700001842 | 3.4                |
| SP_2124080700002000 | 3.4                |
| SP_0503080700000470 | 3.0                |
| SP_1424080700001331 | 2.8                |
| SP_0694080700000646 | 2.8                |
| SP_1579080700001476 | 2.8                |
| SP_1694080700001586 | 2.7                |
| SP_0634080700000592 | 2.7                |
| SP_0174080700000162 | 2.6                |
| SP_0596080700000557 | 2.6                |
| SP_0633080700000591 | 2.6                |
| SP_0543080700000509 | 2.5                |

1 S3i. Differentially expressed genes, reduced in expression >2.5 fold by 1E2-treated compared to  
2 untreated A66.1 cells

| <b>SEQ_ID</b>       | <b>Fold<br/>change</b> |
|---------------------|------------------------|
| SP_1150080700001069 | 2.9                    |

3  
4  
5  
6  
7  
8  
9  
10  
11  
12  
13  
14  
15  
16  
17  
18  
19  
20  
21  
22  
23
